# Supplementary figures and images for: Electroacupuncture protects against cerebral ischemia-reperfusion injury through mitochondrial dynamics
Source: PubMed Central journal article supplement — Heliyon. 2024 Jul 19;10(14):e34986. doi: 10.1016/j.heliyon.2024.e34986 (PMC11325383; doi:10.1016/j.heliyon.2024.e34986), 2024-07-19

Drp1

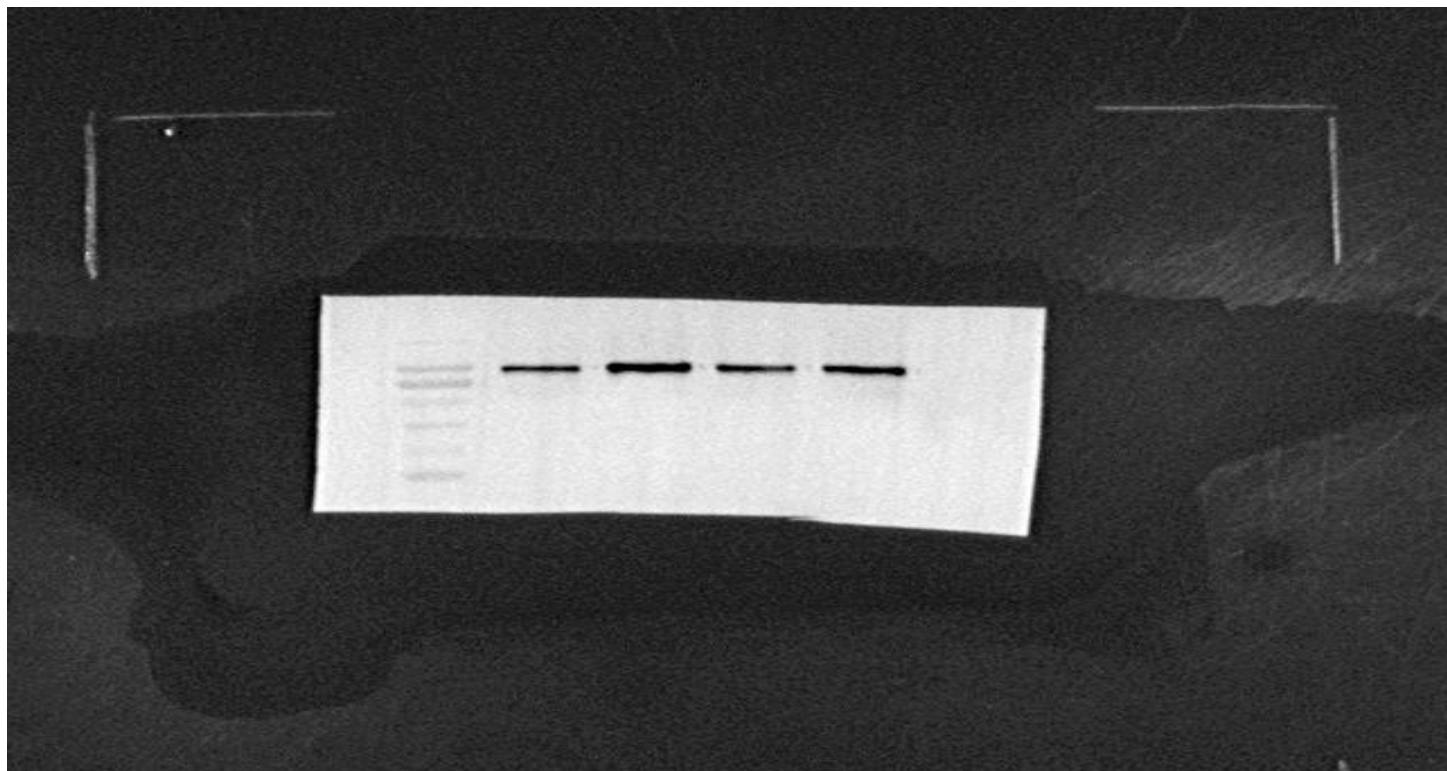

Fis1

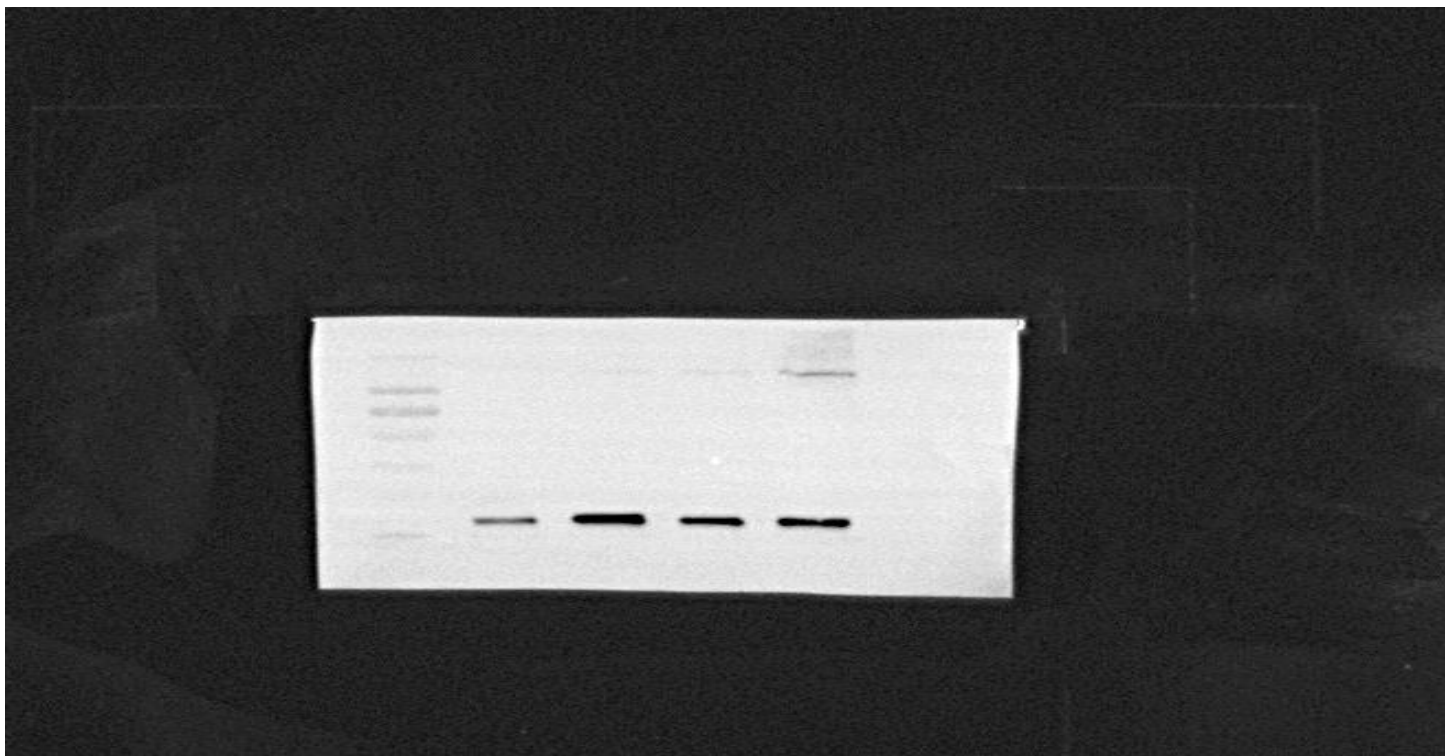

Mfn1

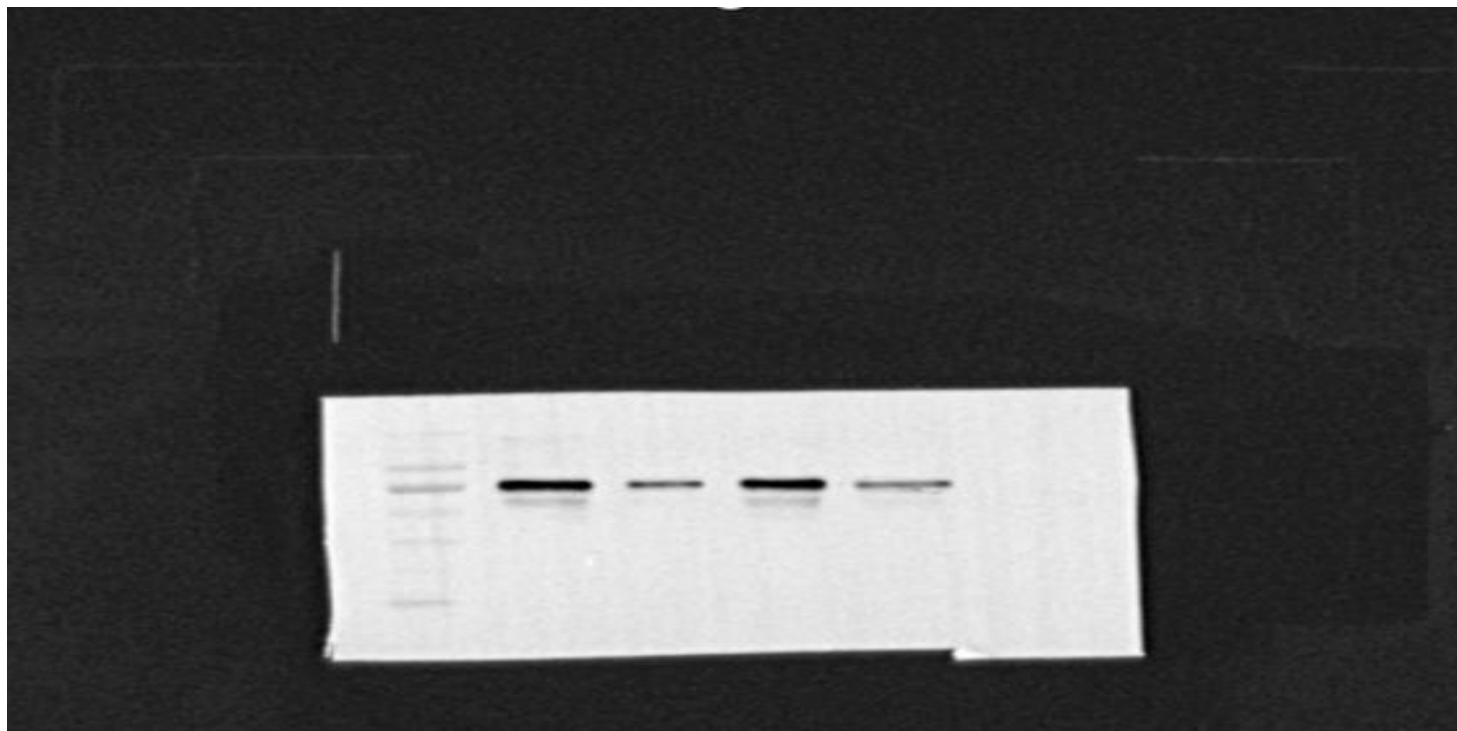

Mfn2

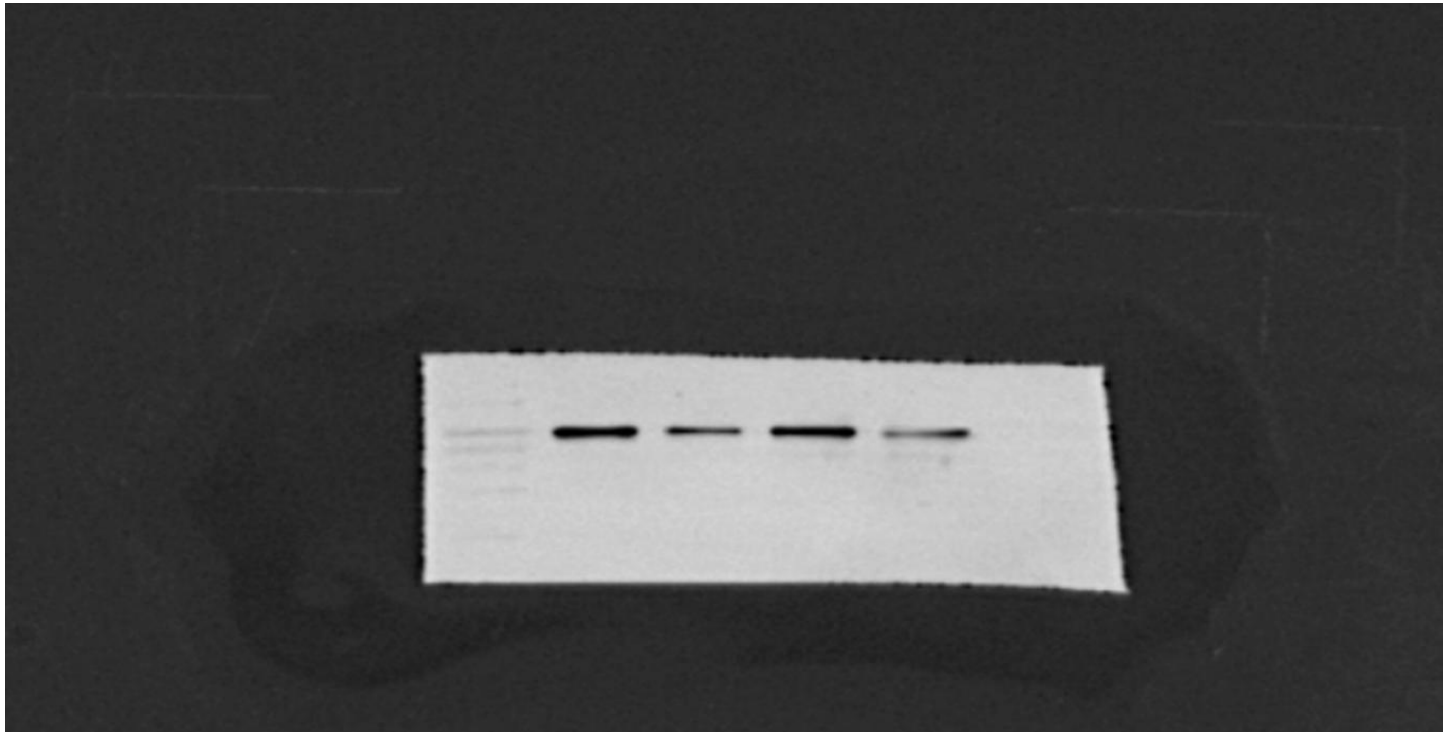

Opa1

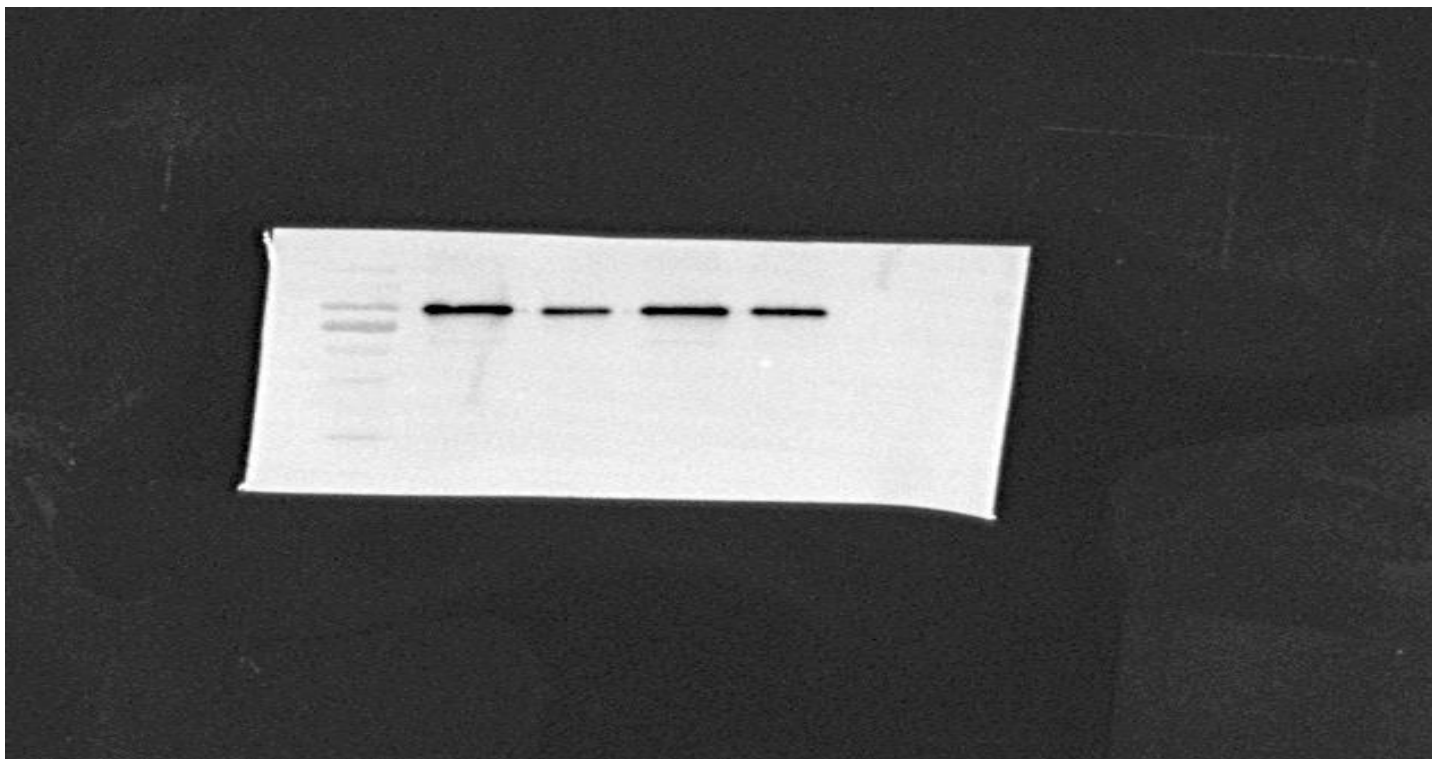

GAPDH

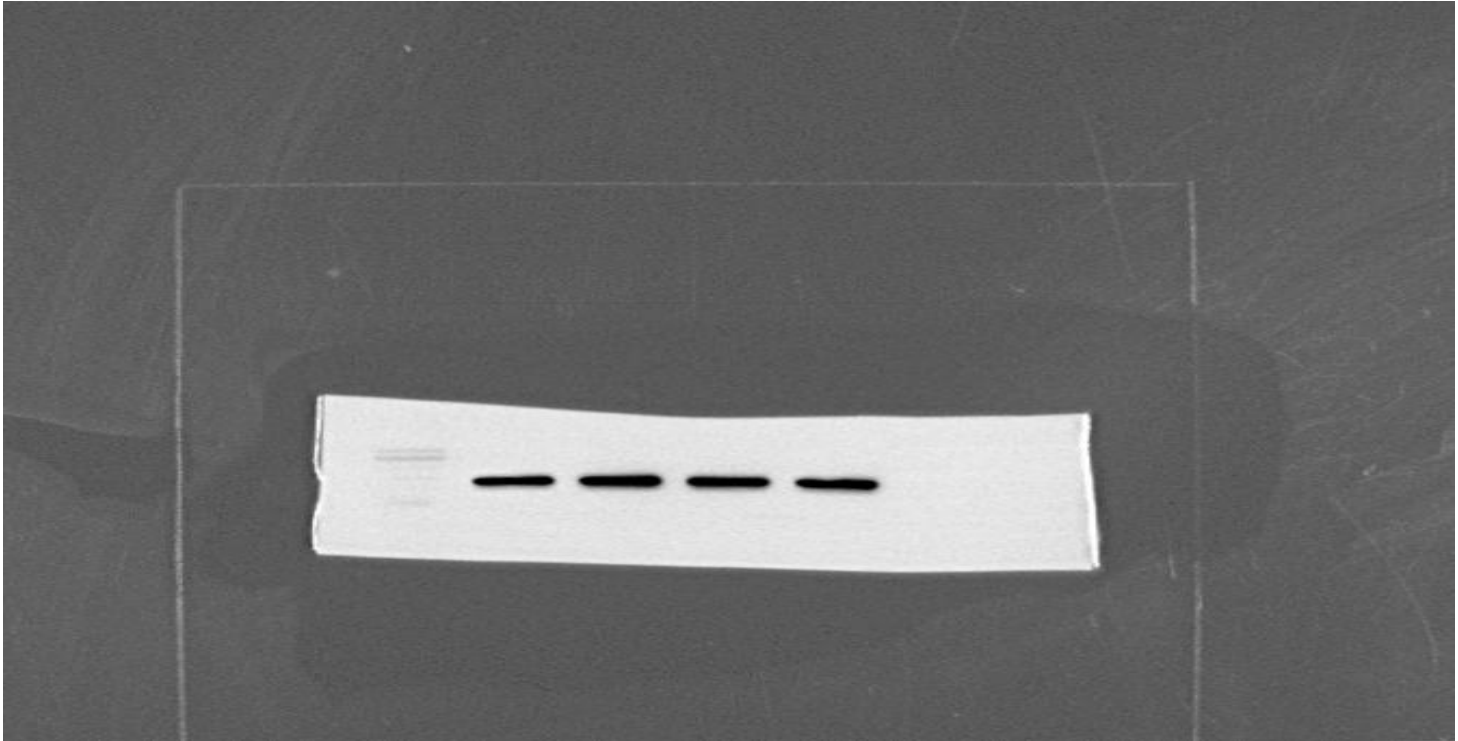

Supplement: mmc1.pdf [file mmc1.pdf]
